# Supplementary material for: rhTPO Ameliorates Radiation-Induced Long-Term Hematopoietic Stem Cell Injury in Mice
Source: MDPI journal article supplement (doi:10.3390/molecules28041953), 2023-02-18
Supplement: s1 [file s1]

## Supplementary Materials

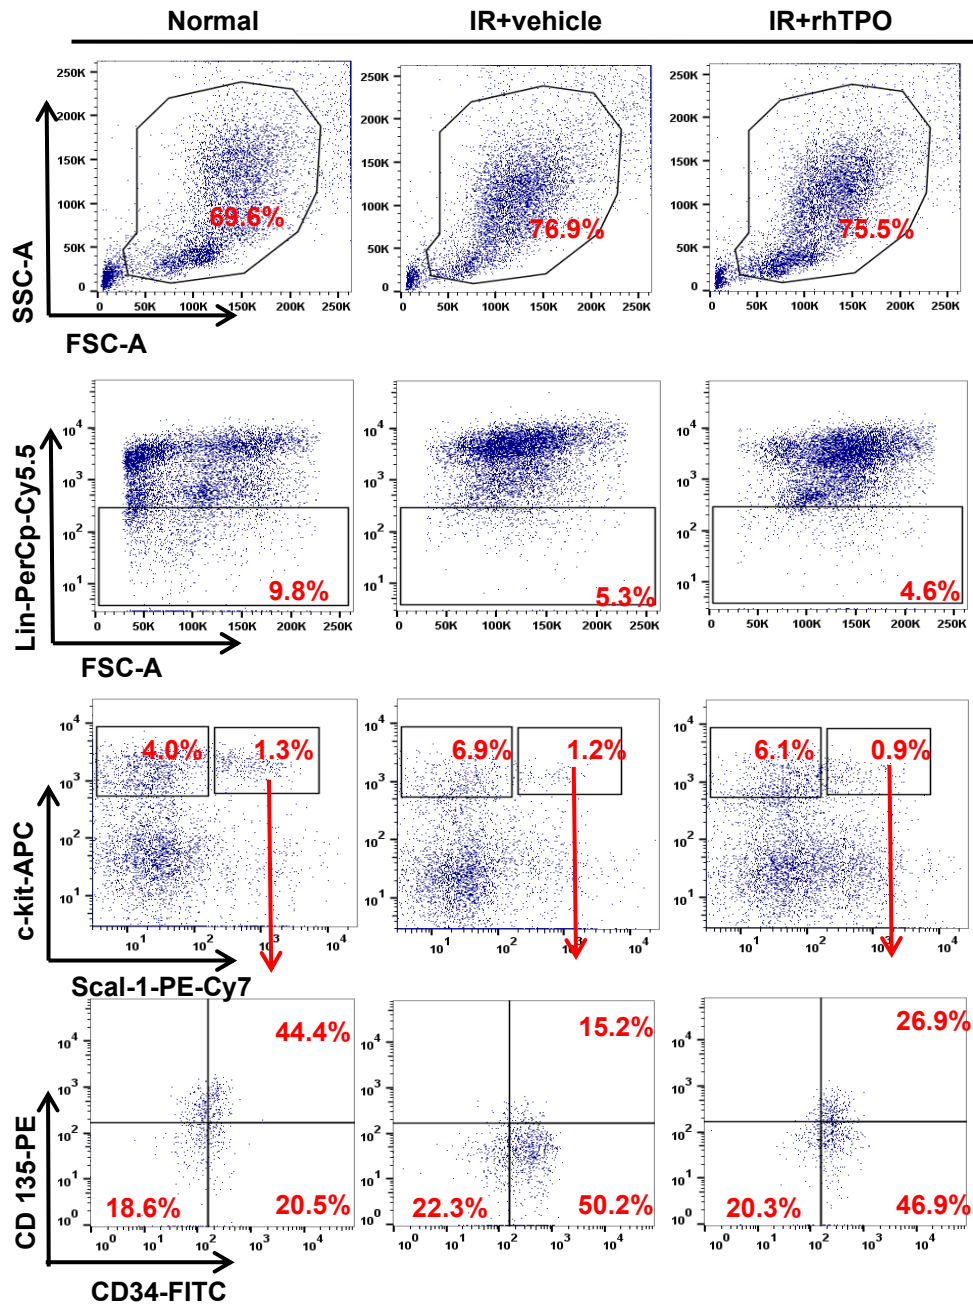

**Supplementary Figure S1:** Representative FACS plots for HSC (Lin–Scal+c-kit+), HPC (Lin–Scal–c-kit+), LT-HSC (CD34–CD135–LSK), ST-HSC (CD34+CD135–LSK), and MPP (CD34+CD135+LSK) cell populations.
